# Supplementary material for: Artificial Neural Network for Automated Keratoconus Detection Using a Combined Placido Disc and Anterior Segment Ocular Coherence Tomography Topographer
Source: PubMed Central journal article supplement (PMC11005070; doi:10.1167/tvst.13.4.13), 2024-04-08
Supplement: tvst-13-4-13_s001.pdf [file tvst-13-4-13_s001.pdf]

| <b><i>Gender and age by group</i></b> | Male | Female | Min Age | 50 <sup>th</sup> perc. | Max Age | Avg Age | SD   |
|---------------------------------------|------|--------|---------|------------------------|---------|---------|------|
| Normal                                | 1324 | 1339   | 18      | 29                     | 92      | 33.9    | 14.8 |
| Suspect keratoconus                   | 108  | 102    | 18      | 29                     | 74      | 32.2    | 13.5 |
| Keratoconus                           | 801  | 815    | 18      | 29                     | 75      | 31.1    | 10.7 |
| Myopic Post op                        | 756  | 763    | 18      | 31                     | 87      | 32.9    | 10.2 |
| Abnormal                              | 330  | 339    | 18      | 48                     | 89      | 48.6    | 17.4 |

**Supplemental Table 1.** Descriptive statistics by gender and age for the Normal, Suspect keratoconus, Keratoconus, Myopic post-op and Abnormal groups.
