# Supplementary material for: Artificial Neural Network for Automated Keratoconus Detection Using a Combined Placido Disc and Anterior Segment Ocular Coherence Tomography Topographer
Source: PubMed Central journal article supplement (PMC11005070; doi:10.1167/tvst.13.4.13), 2024-04-08
Supplement: tvst-13-4-13_s003.pdf [file tvst-13-4-13_s003.pdf]

| Amsler-Krumeich grading | Number of subjects |
|-------------------------|--------------------|
| <b>Stage I</b>          | 374 (23.1%)        |
| <b>Stage II</b>         | 526 (32.5%)        |
| <b>Stage III</b>        | 395 (24.4%)        |
| <b>Stage IV</b>         | 321 (19.9%)        |

**Supplemental Table 3.** Descriptive statistics by stage in Keratoconus group.
