# Supplementary material for: Artificial Neural Network for Automated Keratoconus Detection Using a Combined Placido Disc and Anterior Segment Ocular Coherence Tomography Topographer
Source: PubMed Central journal article supplement (PMC11005070; doi:10.1167/tvst.13.4.13), 2024-04-08
Supplement: tvst-13-4-13_s004.pdf [file tvst-13-4-13_s004.pdf]

| One-Sample Kolmogorov-Smirnov Test |            |               |            |               |             |             |                |               |            |               |
|------------------------------------|------------|---------------|------------|---------------|-------------|-------------|----------------|---------------|------------|---------------|
|                                    | Test Stat. | Asymp. Sig.   | Test Stat. | Asymp. Sig.   | Test Stat.  | Asymp. Sig. | Test Stat.     | Asymp. Sig.   | Test Stat. | Asymp. Sig.   |
|                                    | Normal     |               | Suspect K  |               | Keratoconus |             | Myopic post-op |               | Abnormal   |               |
| SI <sup>F</sup>                    | 0.118      | 0.000         | 0.020      | 0.017         | 0.119       | 0.000       | 0.086          | 0.000         | 0.140      | 0.000         |
| SI <sup>B</sup>                    | 0.081      | 0.018         | 0.019      | 0.027         | 0.104       | 0.000       | 0.073          | 0.000         | 0.137      | 0.000         |
| CSI <sup>F</sup>                   | 0.094      | 0.003         | 0.055      | 0.000         | 0.181       | 0.000       | 0.077          | 0.000         | 0.149      | 0.000         |
| CSI <sup>B</sup>                   | 0.123      | 0.000         | 0.034      | 0.000         | 0.138       | 0.000       | 0.060          | 0.000         | 0.095      | 0.000         |
| EI <sup>F</sup>                    | 0.189      | 0.000         | 0.403      | 0.000         | 0.113       | 0.000       | 0.371          | 0.000         | 0.315      | 0.000         |
| EI <sup>B</sup>                    | 0.131      | 0.000         | 0.427      | 0.000         | 0.100       | 0.000       | 0.328          | 0.000         | 0.315      | 0.000         |
| RMS <sup>F</sup>                   | 0.115      | 0.000         | 0.101      | 0.000         | 0.129       | 0.000       | 0.128          | 0.000         | 0.145      | 0.000         |
| RMS <sup>B</sup>                   | 0.074      | 0.042         | 0.136      | 0.000         | 0.138       | 0.000       | 0.306          | 0.000         | 0.290      | 0.000         |
| Thk <sub>MIN</sub>                 | 0.040      | <b>0.200*</b> | 0.018      | <b>0.065*</b> | 0.062       | 0.000       | 0.018          | <b>0.200*</b> | 0.081      | 0.000         |
| SI <sup>Thk</sup>                  | 0.057      | <b>0.200*</b> | 0.020      | 0.016         | 0.087       | 0.000       | 0.053          | 0.000         | 0.147      | 0.000         |
| %TI                                | 0.109      | 0.000         | 0.124      | 0.000         | 0.076       | 0.000       | 0.023          | <b>0.058*</b> | 0.059      | 0.000         |
| %EpiTI                             | 0.369      | 0.000         | 0.419      | 0.000         | 0.380       | 0.000       | 0.423          | 0.000         | 0.240      | 0.000         |
| K <sub>Max</sub> <sup>F</sup>      | 0.045      | <b>0.200*</b> | 0.020      | 0.023         | 0.076       | 0.000       | 0.032          | 0.001         | 0.078      | 0.000         |
| K <sub>Max</sub> <sup>B</sup>      | 0.081      | 0.017         | 0.081      | 0.000         | 0.051       | 0.000       | 0.104          | 0.000         | 0.037      | <b>0.056*</b> |
| K <sub>avg</sub> <sup>F</sup>      | 0.055      | <b>0.200*</b> | 0.014      | <b>0.200*</b> | 0.108       | 0.000       | 0.062          | 0.000         | 0.125      | 0.000         |
| K <sub>avg</sub> <sup>B</sup>      | 0.053      | <b>0.200*</b> | 0.025      | 0.001         | 0.275       | 0.000       | 0.298          | 0.000         | 0.361      | 0.000         |
| Dz <sub>Max</sub> <sup>F</sup>     | 0.133      | 0.000         | 0.062      | 0.000         | 0.126       | 0.000       | 0.126          | 0.000         | 0.132      | 0.000         |
| Dz <sub>Max</sub> <sup>B</sup>     | 0.099      | 0.001         | 0.113      | 0.000         | 0.119       | 0.000       | 0.277          | 0.000         | 0.140      | 0.000         |
| NPtsR                              | 0.108      | 0.000         | 0.034      | 0.000         | 0.197       | 0.000       | 0.039          | 0.000         | 0.026      | 0.200         |

**Supplemental Table 4.** Kolmogorov-Smirnov test on each endpoint for each group to assess the normality of the distribution of these indices (significance < 0.05; bold numbers\*).
