# Supplementary material for: Artificial Neural Network for Automated Keratoconus Detection Using a Combined Placido Disc and Anterior Segment Ocular Coherence Tomography Topographer
Source: PubMed Central journal article supplement (PMC11005070; doi:10.1167/tvst.13.4.13), 2024-04-08
Supplement: tvst-13-4-13_s005.pdf [file tvst-13-4-13_s005.pdf]

|                                | Mean    | SD      | Minimum | Maximum | Percentiles |       |       |        |        |
|--------------------------------|---------|---------|---------|---------|-------------|-------|-------|--------|--------|
|                                |         |         |         |         | 1           | 5     | 50    | 95     | 99     |
| <b>Normal</b>                  |         |         |         |         |             |       |       |        |        |
| SI <sup>F</sup>                | 0.1572  | 0.3509  | -1.14   | 1.48    | -0.67       | -0.43 | 0.15  | 0.76   | 1.02   |
| SI <sup>B</sup>                | 0.0307  | 0.0791  | -0.29   | 0.41    | -0.15       | -0.10 | 0.03  | 0.16   | 0.24   |
| CSI <sup>F</sup>               | 0.5267  | 0.4629  | -1.07   | 3.46    | -0.51       | -0.17 | 0.51  | 1.28   | 1.98   |
| CSI <sup>B</sup>               | 0.1570  | 0.0952  | -0.14   | 0.50    | -0.05       | 0.01  | 0.15  | 0.32   | 0.40   |
| EI <sup>F</sup>                | 0.1185  | 0.3010  | 0       | 2.35    | 0           | 0     | 0     | 0.76   | 1.49   |
| EI <sup>B</sup>                | 0.0737  | 0.2017  | 0       | 1.95    | 0           | 0     | 0     | 0.50   | 0.96   |
| RMS <sup>F</sup>               | 2.8527  | 1.1418  | 0.82    | 12.21   | 1.18        | 1.48  | 2.61  | 5.06   | 6.75   |
| RMS <sup>B</sup>               | 5.4146  | 2.6068  | 1.63    | 34.86   | 2.34        | 2.82  | 4.85  | 9.80   | 15.29  |
| Thk <sub>MIN</sub>             | 541.0   | 33.8    | 426     | 695     | 464         | 487   | 541   | 596    | 625    |
| SI <sup>Thk</sup>              | 5.5547  | 3.6937  | -11.44  | 19.84   | -2.94       | -0.04 | 5.45  | 11.92  | 14.85  |
| %TI                            | -1.0487 | 1.1077  | -9.79   | 7.96    | -6.49       | -2.15 | -1.04 | 0.39   | 1.49   |
| %EpiTI                         | -0.9332 | 0.1860  | -1.11   | 1.00    | -1.05       | -1.01 | -0.96 | -0.83  | -0.03  |
| K <sub>Max</sub> <sup>F</sup>  | 7.5219  | 0.2914  | 6.62    | 8.68    | 6.83        | 7.04  | 7.53  | 7.99   | 8.15   |
| K <sub>Max</sub> <sup>B</sup>  | 6.1694  | 0.3750  | 1.56    | 7.15    | 4.95        | 5.63  | 6.20  | 6.66   | 6.90   |
| K <sub>avg</sub> <sup>F</sup>  | 7.7148  | 0.2722  | 6.77    | 8.88    | 7.11        | 7.26  | 7.72  | 8.16   | 8.35   |
| K <sub>avg</sub> <sup>B</sup>  | 6.4810  | 0.2895  | 5.65    | 8.10    | 5.84        | 6.02  | 6.46  | 6.98   | 7.27   |
| Dz <sub>Max</sub> <sup>F</sup> | 4.5913  | 1.7345  | 1.00    | 14.96   | 1.68        | 2.27  | 4.34  | 7.91   | 10.18  |
| Dz <sub>Max</sub> <sup>B</sup> | 8.7044  | 3.8918  | 2.33    | 55.86   | 3.46        | 4.47  | 8.01  | 14.78  | 23.53  |
| NPtsR                          | 1.4554  | 0.4835  | 0.18    | 2.89    | 0.51        | 0.70  | 1.44  | 2.27   | 2.58   |
| <b>Keratoconus</b>             |         |         |         |         |             |       |       |        |        |
| SI <sup>F</sup>                | 5.4639  | 4.1897  | -1.48   | 39.90   | 0.60        | 1.23  | 4.44  | 13.03  | 20.13  |
| SI <sup>B</sup>                | 1.4949  | 1.0346  | -0.46   | 8.08    | 0.12        | 0.34  | 1.25  | 3.39   | 5.73   |
| CSI <sup>F</sup>               | 4.4408  | 5.7769  | -2.73   | 52.61   | -1.74       | -0.65 | 2.84  | 13.83  | 29.70  |
| CSI <sup>B</sup>               | 1.2580  | 1.4231  | -1.59   | 9.62    | -0.52       | -0.20 | 0.86  | 3.98   | 7.23   |
| EI <sup>F</sup>                | 11.0995 | 8.3325  | 0       | 71.27   | 0.41        | 2.08  | 9.17  | 27.18  | 39.96  |
| EI <sup>B</sup>                | 12.7910 | 8.2327  | 0       | 57.70   | 0.65        | 2.84  | 10.89 | 28.63  | 39.32  |
| RMS <sup>F</sup>               | 17.8659 | 12.5170 | 2.13    | 101.88  | 3.84        | 5.43  | 14.68 | 40.60  | 68.68  |
| RMS <sup>B</sup>               | 34.4133 | 24.4962 | 5.36    | 286.00  | 7.84        | 10.80 | 28.43 | 76.65  | 130.02 |
| Thk <sub>MIN</sub>             | 442.2   | 57.2    | 160     | 584     | 241         | 343   | 449   | 519    | 549    |
| SI <sup>Thk</sup>              | 26.5728 | 15.8175 | -61.59  | 117.35  | -0.44       | 7.40  | 23.61 | 55.35  | 82.37  |
| %TI                            | 6.5288  | 4.0338  | -5.78   | 23.79   | -0.32       | 1.32  | 5.81  | 13.70  | 19.98  |
| %EpiTI                         | 0.8387  | 0.4505  | -1.04   | 1.00    | -0.97       | -0.75 | 0.99  | 1.00   | 1.00   |
| K <sub>Max</sub> <sup>F</sup>  | 6.2809  | 0.7871  | 3.13    | 7.85    | 3.79        | 4.65  | 6.42  | 7.32   | 7.57   |
| K <sub>Max</sub> <sup>B</sup>  | 4.4607  | 0.8154  | 1.92    | 6.24    | 2.38        | 2.94  | 4.55  | 5.67   | 5.98   |
| K <sub>avg</sub> <sup>F</sup>  | 7.0109  | 0.7849  | 3.45    | 8.64    | 4.31        | 5.40  | 7.18  | 7.98   | 8.27   |
| K <sub>avg</sub> <sup>B</sup>  | 5.7003  | 2.6020  | 2.65    | 85.05   | 3.19        | 4.03  | 5.62  | 6.92   | 11.17  |
| Dz <sub>Max</sub> <sup>F</sup> | 38.2438 | 26.2939 | 3.96    | 214.19  | 7.61        | 10.84 | 31.44 | 91.87  | 144.13 |
| Dz <sub>Max</sub> <sup>B</sup> | 84.8231 | 55.1712 | -105.20 | 454.28  | 17.65       | 24.90 | 71.23 | 188.67 | 283.13 |
| NPtsR                          | 0.3388  | 0.2643  | 0.06    | 2.58    | 0.09        | 0.13  | 0.27  | 0.76   | 1.61   |
| <b>Suspect keratoconus</b>     |         |         |         |         |             |       |       |        |        |
| SI <sup>F</sup>                | 0.7707  | 0.4717  | -0.54   | 2.57    | -0.42       | 0.20  | 0.70  | 1.71   | 2.40   |
| SI <sup>B</sup>                | 0.2114  | 0.1455  | -0.18   | 0.88    | -0.11       | 0.02  | 0.19  | 0.51   | 0.72   |
| CSI <sup>F</sup>               | 0.6688  | 0.6608  | -0.55   | 2.90    | -0.48       | -0.16 | 0.54  | 2.05   | 2.85   |
| CSI <sup>B</sup>               | 0.2235  | 0.1934  | -0.21   | 1.00    | -0.19       | -0.05 | 0.19  | 0.63   | 0.98   |
| EI <sup>F</sup>                | 0.9442  | 1.0708  | 0       | 5.91    | 0           | 0     | 0.66  | 3.28   | 5.40   |
| EI <sup>B</sup>                | 1.4394  | 1.2846  | 0       | 6.77    | 0           | 0     | 1.16  | 3.94   | 6.68   |

|                                     |         |         |         |         |        |        |       |       |        |
|-------------------------------------|---------|---------|---------|---------|--------|--------|-------|-------|--------|
| <b>RMS<sup>F</sup></b>              | 3.9458  | 1.5018  | 1.30    | 9.23    | 1.51   | 2.10   | 3.60  | 7.22  | 9.02   |
| <b>RMS<sup>B</sup></b>              | 7.2752  | 2.6379  | 2.36    | 16.15   | 2.75   | 3.70   | 7.05  | 12.26 | 16.05  |
| <b>Thk<sub>MIN</sub></b>            | 506.2   | 37.6    | 406     | 589     | 410    | 437    | 508   | 570   | 587    |
| <b>SI<sup>Thk</sup></b>             | 9.0688  | 5.4483  | -9.84   | 31.30   | -8.07  | -0.12  | 8.93  | 17.69 | 25.57  |
| <b>%TI</b>                          | 0.1595  | 1.6933  | -6.22   | 6.79    | -4.56  | -1.95  | -0.20 | 3.21  | 5.88   |
| <b>%EpiTI</b>                       | -0.5497 | 0.7257  | -1.02   | 1.00    | -1.02  | -1.00  | -0.95 | 0.99  | 1.00   |
| <b>K<sub>Max</sub><sup>F</sup></b>  | 7.4171  | 0.2850  | 6.73    | 8.01    | 6.75   | 6.94   | 7.41  | 7.93  | 8.01   |
| <b>K<sub>Max</sub><sup>B</sup></b>  | 5.9715  | 0.3222  | 4.63    | 6.83    | 4.78   | 5.42   | 6.00  | 6.45  | 6.76   |
| <b>K<sub>avg</sub><sup>F</sup></b>  | 7.6783  | 0.3033  | 7.01    | 8.39    | 7.07   | 7.20   | 7.64  | 8.22  | 8.38   |
| <b>K<sub>avg</sub><sup>B</sup></b>  | 6.3931  | 0.2996  | 5.52    | 7.12    | 5.59   | 5.95   | 6.36  | 6.90  | 7.11   |
| <b>Dz<sub>Max</sub><sup>F</sup></b> | 7.2284  | 2.9265  | 2.53    | 18.64   | 2.78   | 3.62   | 6.40  | 12.97 | 17.50  |
| <b>Dz<sub>Max</sub><sup>B</sup></b> | 14.7557 | 6.7643  | 4.09    | 38.45   | 4.66   | 6.13   | 13.35 | 27.18 | 37.71  |
| <b>NPtsR</b>                        | 0.8605  | 0.5105  | 0.11    | 2.49    | 0.12   | 0.27   | 0.73  | 1.85  | 2.46   |
| <b>Myopic post-op</b>               |         |         |         |         |        |        |       |       |        |
| <b>SI<sup>F</sup></b>               | 0.2931  | 0.7239  | -3.85   | 12.25   | -1.23  | -0.68  | 0.28  | 1.24  | 2.18   |
| <b>SI<sup>B</sup></b>               | 0.0286  | 0.0944  | -0.82   | 1.04    | -0.17  | -0.10  | 0.03  | 0.16  | 0.29   |
| <b>CSI<sup>F</sup></b>              | -0.8319 | 1.2698  | -9.23   | 2.52    | -5.00  | -3.03  | -0.69 | 0.94  | 1.76   |
| <b>CSI<sup>B</sup></b>              | 0.1256  | 0.1209  | -1.59   | 0.81    | -0.10  | -0.03  | 0.12  | 0.31  | 0.43   |
| <b>EI<sup>F</sup></b>               | 0.3016  | 0.8493  | 0       | 18.57   | 0      | 0      | 0     | 1.53  | 3.29   |
| <b>EI<sup>B</sup></b>               | 0.1435  | 0.4796  | 0       | 11.26   | 0      | 0      | 0     | 0.78  | 1.82   |
| <b>RMS<sup>F</sup></b>              | 5.3935  | 2.5851  | 1.11    | 30.93   | 2.14   | 2.75   | 4.83  | 9.53  | 15.36  |
| <b>RMS<sup>B</sup></b>              | 5.6793  | 6.2527  | 2.21    | 194.32  | 2.55   | 3.19   | 4.97  | 8.79  | 17.79  |
| <b>Thk<sub>MIN</sub></b>            | 464.6   | 44.6    | 306     | 619     | 358    | 390    | 465   | 539   | 563    |
| <b>SI<sup>Thk</sup></b>             | 4.4979  | 7.1260  | -64.34  | 65.30   | -13.13 | -5.51  | 4.51  | 15.41 | 20.60  |
| <b>%TI</b>                          | 4.2098  | 2.5991  | -9.39   | 16.44   | -0.95  | 0.36   | 4.15  | 8.57  | 10.53  |
| <b>%EpiTI</b>                       | -0.7687 | 0.5248  | -1.19   | 1.00    | -1.05  | -1.01  | -0.96 | 0.90  | 1.00   |
| <b>K<sub>Max</sub><sup>F</sup></b>  | 7.4171  | 0.3792  | 5.39    | 8.57    | 6.31   | 6.76   | 7.44  | 8.00  | 8.29   |
| <b>K<sub>Max</sub><sup>B</sup></b>  | 6.1033  | 0.4297  | 1.49    | 7.10    | 4.64   | 5.39   | 6.15  | 6.64  | 6.85   |
| <b>K<sub>avg</sub><sup>F</sup></b>  | 8.3713  | 0.4513  | 7.37    | 11.43   | 7.59   | 7.77   | 8.31  | 9.14  | 9.84   |
| <b>K<sub>avg</sub><sup>B</sup></b>  | 6.5729  | 1.1779  | 5.63    | 50.08   | 5.82   | 6.07   | 6.53  | 7.05  | 7.24   |
| <b>Dz<sub>Max</sub><sup>F</sup></b> | 9.5632  | 4.7148  | 2.83    | 54.92   | 3.76   | 4.76   | 8.62  | 16.87 | 27.14  |
| <b>Dz<sub>Max</sub><sup>B</sup></b> | 10.0760 | 11.1676 | 2.31    | 336.73  | 3.65   | 4.79   | 8.80  | 17.14 | 32.20  |
| <b>NPtsR</b>                        | 1.8879  | 0.4806  | 0.26    | 3.00    | 0.86   | 1.04   | 1.92  | 2.63  | 2.81   |
| <b>Abnormal</b>                     |         |         |         |         |        |        |       |       |        |
| <b>SI<sup>F</sup></b>               | 0.7193  | 4.3397  | -18.00  | 22.95   | -9.91  | -5.59  | 0.37  | 9.04  | 18.07  |
| <b>SI<sup>B</sup></b>               | 0.1829  | 0.8774  | -4.62   | 4.04    | -2.91  | -0.92  | 0.09  | 1.63  | 3.03   |
| <b>CSI<sup>F</sup></b>              | 0.2077  | 5.0762  | -14.97  | 23.20   | -10    | -6.76  | -0.09 | 10.98 | 19.74  |
| <b>CSI<sup>B</sup></b>              | 0.1197  | 0.8678  | -4.53   | 3.00    | -2.82  | -1.23  | 0.14  | 1.59  | 2.49   |
| <b>EI<sup>F</sup></b>               | 3.6587  | 7.5852  | 0       | 71.67   | 0      | 0      | 0.21  | 18.85 | 35.80  |
| <b>EI<sup>B</sup></b>               | 1.9247  | 3.9919  | 0       | 31.17   | 0      | 0      | 0     | 11.16 | 18.84  |
| <b>RMS<sup>F</sup></b>              | 21.2811 | 17.6168 | 2.43    | 148.13  | 3.14   | 4.59   | 16.50 | 51.70 | 89.05  |
| <b>RMS<sup>B</sup></b>              | 39.5106 | 64.7475 | 3.59    | 1257.02 | 4.19   | 5.66   | 30.53 | 89.83 | 228.75 |
| <b>Thk<sub>MIN</sub></b>            | 496.0   | 102.5   | 72      | 923     | 175    | 317    | 509   | 639   | 756    |
| <b>SI<sup>Thk</sup></b>             | 5.3713  | 25.3369 | -221.41 | 129.51  | -80.87 | -24.27 | 5.50  | 41.55 | 65.74  |
| <b>%TI</b>                          | 5.3938  | 4.8708  | -6.68   | 26.03   | -2.02  | -1.28  | 4.98  | 14.42 | 19.16  |
| <b>%EpiTI</b>                       | -0.0724 | 0.8995  | -1.19   | 1.00    | -1.09  | -1.00  | -0.56 | 1.00  | 1.00   |
| <b>K<sub>Max</sub><sup>F</sup></b>  | 5.8320  | 1.1122  | 2.62    | 7.99    | 3.24   | 3.96   | 5.85  | 7.46  | 7.85   |
| <b>K<sub>Max</sub><sup>B</sup></b>  | 4.6691  | 0.9370  | 2.28    | 8.17    | 2.63   | 3.07   | 4.63  | 6.13  | 6.60   |
| <b>K<sub>avg</sub><sup>F</sup></b>  | 7.7791  | 0.9666  | 4.41    | 15.27   | 5.37   | 6.59   | 7.65  | 9.46  | 11.53  |
| <b>K<sub>avg</sub><sup>B</sup></b>  | 7.8795  | 8.7506  | 4.43    | 152.36  | 4.95   | 5.50   | 6.35  | 13.69 | 32.09  |

|                                     |         |         |        |        |      |      |       |        |        |
|-------------------------------------|---------|---------|--------|--------|------|------|-------|--------|--------|
| <b>Dz<sub>Max</sub><sup>F</sup></b> | 40.0429 | 32.7342 | 1.87   | 251.11 | 4.61 | 7.26 | 30.34 | 101.50 | 158.39 |
| <b>Dz<sub>Max</sub><sup>B</sup></b> | 64.2505 | 55.0064 | -99.78 | 538.30 | 6.77 | 9.98 | 53.17 | 161.34 | 278.61 |
| <b>NPtsR</b>                        | 1.6970  | 0.6331  | 0.15   | 3.50   | 0.27 | 0.61 | 1.71  | 2.71   | 3.15   |

**Supplemental Table 5.** Descriptive statistics in terms of mean (with standard deviation) and percentiles for each endpoint and each group.
